# Supplementary material
Source: Springer Nature journal article supplement (https://www.springermedizin.de/resource/supplementary/12885_2013_3888_MOESM2_ESM.pdf/9464610)
Supplement: MOESM2 [file 9464610]

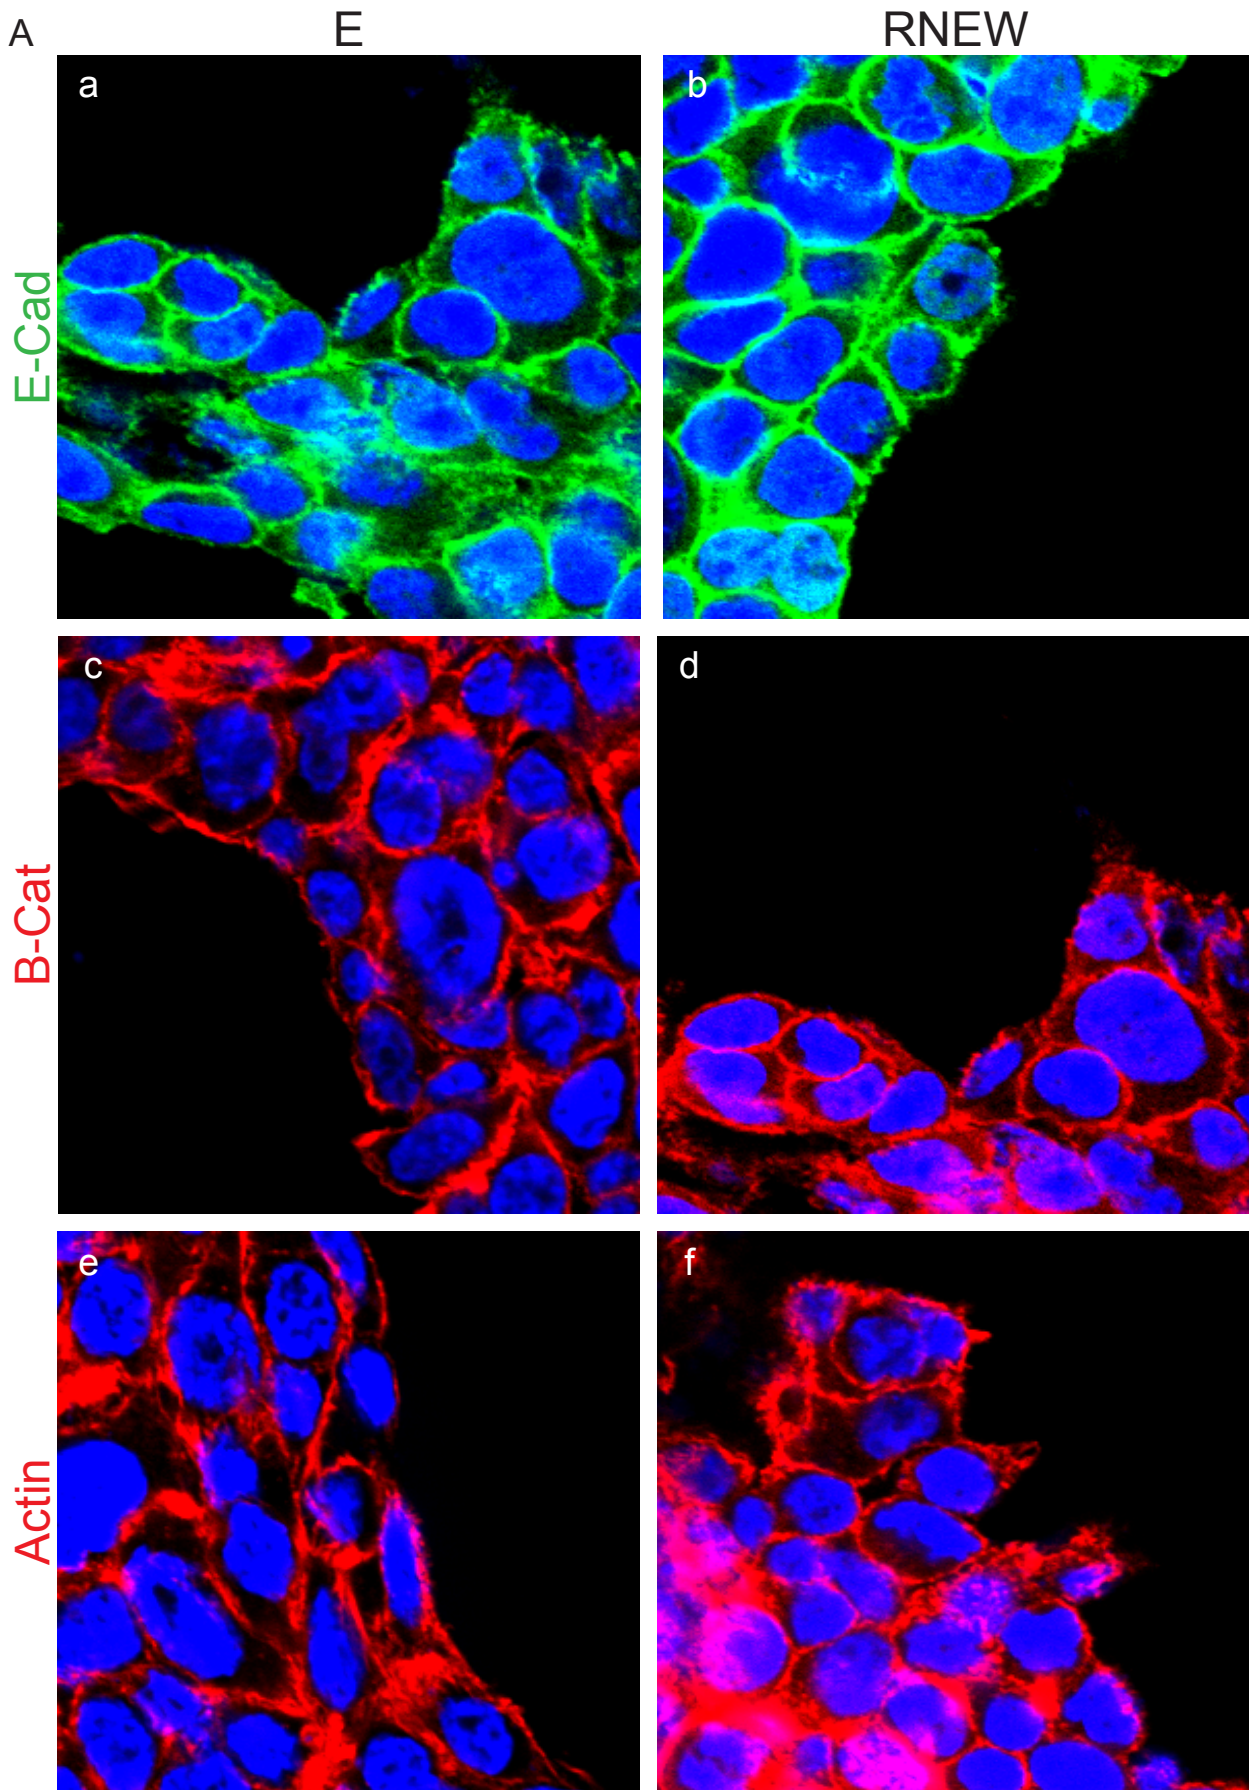

**Supplemental Figure 2: Growth on 2-D matrigel coated slides does not induce invasive characteristics.**

A) Confocal images of round or disc colonies of HCT-116 cells grown on slides coated with matrigel in E or RNEW media for 6 days. a, c, and e: cells grown in E media; b, d, and f: cells grown in RNEW media; a-b: E-cadherin merged with DNA; c-d:  $\beta$ -catenin merged with DNA, and e-g: actin merged with DNA.
